# Supplementary material for: Broadening Participation of Women and Underrepresented Minorities in STEM through a Hybrid Online Transfer Program
Source: Atypon-hosted journal article supplement (doi:10.1187/cbe.16-01-0065), 2016-09-01
Supplement: combinedsupmats.pdf [file combinedsupmats.pdf]

# Supplemental Material

*CBE—Life Sciences Education*

Drew *et al.*

Enrollment by race and gender

| Term   | College |          | Gender | Race                                    | N  |
|--------|---------|----------|--------|-----------------------------------------|----|
| 201108 | CALS    | ftic     | F      | American Indian or Alaska Native (I)    | 1  |
| 201108 | CALS    | ftic     | F      | Asian (A)                               | 21 |
| 201108 | CALS    | ftic     | F      | Black or African American (B)           | 8  |
| 201108 | CALS    | ftic     | F      | Hispanic/Latino (H)                     | 15 |
| 201108 | CALS    | ftic     | F      | Native Hawaiian or Other Pacific Island | 1  |
| 201108 | CALS    | ftic     | F      | Race and Ethnicity Unknown (X)          | 1  |
| 201108 | CALS    | ftic     | F      | Two or More Races (M)                   | 5  |
| 201108 | CALS    | ftic     | F      | White (W)                               | 56 |
| 201108 | CALS    | ftic     | M      | Asian (A)                               | 14 |
| 201108 | CALS    | ftic     | M      | Black or African American (B)           | 5  |
| 201108 | CALS    | ftic     | M      | Hispanic/Latino (H)                     | 12 |
| 201108 | CALS    | ftic     | M      | Nonresident Alien (O)                   | 2  |
| 201108 | CALS    | ftic     | M      | Race and Ethnicity Unknown (X)          | 3  |
| 201108 | CALS    | ftic     | M      | Two or More Races (M)                   | 3  |
| 201108 | CALS    | ftic     | M      | White (W)                               | 60 |
| 201108 | CALS    | transfer | F      | Asian (A)                               | 2  |
| 201108 | CALS    | transfer | F      | Black or African American (B)           | 1  |
| 201108 | CALS    | transfer | F      | Hispanic/Latino (H)                     | 6  |
| 201108 | CALS    | transfer | F      | Two or More Races (M)                   | 1  |
| 201108 | CALS    | transfer | F      | White (W)                               | 16 |
| 201108 | CALS    | transfer | M      | American Indian or Alaska Native (I)    | 1  |
| 2011   | CALS    | transfer | M      | Asian (A)                               | 3  |
| 2011   | CALS    | transfer | M      | Black or African American (B)           | 1  |
| 2011   | CALS    | transfer | M      | Hispanic/Latino (H)                     | 8  |
| 2011   | CALS    | transfer | M      | Race and Ethnicity Unknown (X)          | 4  |
| 2011   | CALS    | transfer | M      | White (W)                               | 15 |
| 2011   | DE MCS  |          | F      | Asian (A)                               | 1  |
| 2011   | DE MCS  |          | F      | Hispanic/Latino (H)                     | 2  |
| 2011   | DE MCS  |          | F      | Race and Ethnicity Unknown (X)          | 1  |
| 2011   | DE MCS  |          | F      | White (W)                               | 5  |
| 2011   | DE MCS  |          | M      | Hispanic/Latino (H)                     | 1  |
| 2011   | DE MCS  |          | M      | White (W)                               | 1  |
| 2011   | CLAS    | ftic     | F      | American Indian or Alaska Native (I)    | 2  |
| 2011   | CLAS    | ftic     | F      | Asian (A)                               | 58 |
| 2011   | CLAS    | ftic     | F      | Black or African American (B)           | 18 |
| 2011   | CLAS    | ftic     | F      | Hispanic/Latino (H)                     | 36 |
| 2011   | CLAS    | ftic     | F      | Native Hawaiian or Other Pacific Island | 1  |
| 2011   | CLAS    | ftic     | F      | Race and Ethnicity Unknown (X)          | 6  |
| 2011   | CLAS    | ftic     | F      | Two or More Races (M)                   | 5  |
| 2011   | CLAS    | ftic     | F      | White (W)                               | 76 |
| 2011   | CLAS    | ftic     | M      | Asian (A)                               | 31 |
| 2011   | CLAS    | ftic     | M      | Black or African American (B)           | 8  |
| 2011   | CLAS    | ftic     | M      | Hispanic/Latino (H)                     | 15 |
| 2011   | CLAS    | ftic     | M      | Native Hawaiian or Other Pacific Island | 3  |
| 2011   | CLAS    | ftic     | M      | Race and Ethnicity Unknown (X)          | 5  |
| 2011   | CLAS    | ftic     | M      | Two or More Races (M)                   | 1  |
| 2011   | CLAS    | ftic     | M      | White (W)                               | 60 |
| 2011   | CLAS    | transfer | F      | Asian (A)                               | 1  |

|             |          |   |                                         |    |
|-------------|----------|---|-----------------------------------------|----|
| 2011 CLAS   | transfer | F | Hispanic/Latino (H)                     | 2  |
| 2011 CLAS   | transfer | F | Nonresident Alien (O)                   | 1  |
| 2011 CLAS   | transfer | F | White (W)                               | 4  |
| 2011 CLAS   | transfer | M | Asian (A)                               | 1  |
| 2011 CLAS   | transfer | M | Black or African American (B)           | 1  |
| 2011 CLAS   | transfer | M | Hispanic/Latino (H)                     | 3  |
| 2011 CLAS   | transfer | M | Race and Ethnicity Unknown (X)          | 1  |
| 2012 CALS   | ftic     | F | Asian (A)                               | 14 |
| 2012 CALS   | ftic     | F | Black or African American (B)           | 6  |
| 2012 CALS   | ftic     | F | Hispanic/Latino (H)                     | 16 |
| 2012 CALS   | ftic     | F | Native Hawaiian or Other Pacific Island | 1  |
| 2012 CALS   | ftic     | F | Race and Ethnicity Unknown (X)          | 5  |
| 2012 CALS   | ftic     | F | Two or More Races (M)                   | 4  |
| 2012 CALS   | ftic     | F | White (W)                               | 47 |
| 2012 CALS   | ftic     | M | Asian (A)                               | 16 |
| 2012 CALS   | ftic     | M | Black or African American (B)           | 3  |
| 2012 CALS   | ftic     | M | Hispanic/Latino (H)                     | 11 |
| 2012 CALS   | ftic     | M | Nonresident Alien (O)                   | 1  |
| 2012 CALS   | ftic     | M | Race and Ethnicity Unknown (X)          | 4  |
| 2012 CALS   | ftic     | M | Two or More Races (M)                   | 3  |
| 2012 CALS   | ftic     | M | White (W)                               | 45 |
| 2012 CALS   | transfer | F | American Indian or Alaska Native (I)    | 1  |
| 2012 CALS   | transfer | F | Asian (A)                               | 1  |
| 2012 CALS   | transfer | F | Black or African American (B)           | 3  |
| 2012 CALS   | transfer | F | Hispanic/Latino (H)                     | 7  |
| 2012 CALS   | transfer | F | White (W)                               | 15 |
| 2012 CALS   | transfer | M | Asian (A)                               | 1  |
| 2012 CALS   | transfer | M | Hispanic/Latino (H)                     | 5  |
| 2012 CALS   | transfer | M | Native Hawaiian or Other Pacific Island | 3  |
| 2012 CALS   | transfer | M | Race and Ethnicity Unknown (X)          | 6  |
| 2012 CALS   | transfer | M | White (W)                               | 19 |
| 2012 DE MCS | ftic     | F | Asian (A)                               | 1  |
| 2012 DE MCS | transfer | F | Hispanic/Latino (H)                     | 5  |
| 2012 DE MCS | transfer | F | White (W)                               | 13 |
| 2012 DE MCS | transfer | M | Black or African American (B)           | 1  |
| 2012 DE MCS | transfer | M | Hispanic/Latino (H)                     | 1  |
| 2012 DE MCS | transfer | M | White (W)                               | 2  |
| 2012 CLAS   | ftic     | F | Asian (A)                               | 53 |
| 2012 CLAS   | ftic     | F | Black or African American (B)           | 16 |
| 2012 CLAS   | ftic     | F | Hispanic/Latino (H)                     | 41 |
| 2012 CLAS   | ftic     | F | Native Hawaiian or Other Pacific Island | 5  |
| 2012 CLAS   | ftic     | F | Race and Ethnicity Unknown (X)          | 5  |
| 2012 CLAS   | ftic     | F | Two or More Races (M)                   | 6  |
| 2012 CLAS   | ftic     | F | White (W)                               | 83 |
| 2012 CLAS   | ftic     | M | Asian (A)                               | 40 |
| 2012 CLAS   | ftic     | M | Black or African American (B)           | 7  |
| 2012 CLAS   | ftic     | M | Hispanic/Latino (H)                     | 32 |
| 2012 CLAS   | ftic     | M | Native Hawaiian or Other Pacific Island | 2  |
| 2012 CLAS   | ftic     | M | Race and Ethnicity Unknown (X)          | 4  |

|             |          |   |                                         |    |
|-------------|----------|---|-----------------------------------------|----|
| 2012 CLAS   | ftic     | M | Two or More Races (M)                   | 3  |
| 2012 CLAS   | ftic     | M | White (W)                               | 74 |
| 2012 CLAS   | transfer | F | Asian (A)                               | 3  |
| 2012 CLAS   | transfer | F | Hispanic/Latino (H)                     | 2  |
| 2012 CLAS   | transfer | F | White (W)                               | 4  |
| 2012 CLAS   | transfer | M | Asian (A)                               | 2  |
| 2012 CLAS   | transfer | M | Black or African American (B)           | 1  |
| 2012 CLAS   | transfer | M | Hispanic/Latino (H)                     | 2  |
| 2012 CLAS   | transfer | M | Race and Ethnicity Unknown (X)          | 1  |
| 2012 CLAS   | transfer | M | White (W)                               | 2  |
|             |          |   |                                         |    |
| 2013 CALS   | ftic     | F | Asian (A)                               | 9  |
| 2013 CALS   | ftic     | F | Black or African American (B)           | 3  |
| 2013 CALS   | ftic     | F | Hispanic/Latino (H)                     | 21 |
| 2013 CALS   | ftic     | F | Native Hawaiian or Other Pacific Island | 4  |
| 2013 CALS   | ftic     | F | Race and Ethnicity Unknown (X)          | 4  |
| 2013 CALS   | ftic     | F | Two or More Races (M)                   | 4  |
| 2013 CALS   | ftic     | F | White (W)                               | 41 |
| 2013 CALS   | ftic     | M | Asian (A)                               | 13 |
| 2013 CALS   | ftic     | M | Black or African American (B)           | 3  |
| 2013 CALS   | ftic     | M | Hispanic/Latino (H)                     | 9  |
| 2013 CALS   | ftic     | M | Native Hawaiian or Other Pacific Island | 1  |
| 2013 CALS   | ftic     | M | Race and Ethnicity Unknown (X)          | 6  |
| 2013 CALS   | ftic     | M | Two or More Races (M)                   | 3  |
| 2013 CALS   | ftic     | M | White (W)                               | 53 |
| 2013 CALS   | transfer | F | Asian (A)                               | 1  |
| 2013 CALS   | transfer | F | Black or African American (B)           | 3  |
| 2013 CALS   | transfer | F | Hispanic/Latino (H)                     | 10 |
| 2013 CALS   | transfer | F | White (W)                               | 11 |
| 2013 CALS   | transfer | M | Asian (A)                               | 1  |
| 2013 CALS   | transfer | M | Black or African American (B)           | 2  |
| 2013 CALS   | transfer | M | Hispanic/Latino (H)                     | 4  |
| 2013 CALS   | transfer | M | Native Hawaiian or Other Pacific Island | 1  |
| 2013 CALS   | transfer | M | Race and Ethnicity Unknown (X)          | 2  |
| 2013 CALS   | transfer | M | Two or More Races (M)                   | 1  |
| 2013 CALS   | transfer | M | White (W)                               | 23 |
| 2013 DE MCS | ftic     | F | Asian (A)                               | 1  |
| 2013 DE MCS | transfer | F | Black or African American (B)           | 1  |
| 2013 DE MCS | transfer | F | Hispanic/Latino (H)                     | 9  |
| 2013 DE MCS | transfer | F | Race and Ethnicity Unknown (X)          | 4  |
| 2013 DE MCS | transfer | F | Two or More Races (M)                   | 1  |
| 2013 DE MCS | transfer | F | White (W)                               | 11 |
| 2013 DE MCS | transfer | M | Black or African American (B)           | 3  |
| 2013 DE MCS | transfer | M | Hispanic/Latino (H)                     | 5  |
| 2013 DE MCS | transfer | M | Race and Ethnicity Unknown (X)          | 1  |
| 2013 DE MCS | transfer | M | White (W)                               | 5  |
| 2013 CLAS   | ftic     | F | Asian (A)                               | 52 |
| 2013 CLAS   | ftic     | F | Black or African American (B)           | 15 |
| 2013 CLAS   | ftic     | F | Hispanic/Latino (H)                     | 34 |
| 2013 CLAS   | ftic     | F | Native Hawaiian or Other Pacific Island | 3  |

|             |          |   |                                         |    |
|-------------|----------|---|-----------------------------------------|----|
| 2013 CLAS   | ftic     | F | Nonresident Alien (O)                   | 2  |
| 2013 CLAS   | ftic     | F | Race and Ethnicity Unknown (X)          | 8  |
| 2013 CLAS   | ftic     | F | Two or More Races (M)                   | 6  |
| 2013 CLAS   | ftic     | F | White (W)                               | 80 |
| 2013 CLAS   | ftic     | M | Asian (A)                               | 29 |
| 2013 CLAS   | ftic     | M | Black or African American (B)           | 3  |
| 2013 CLAS   | ftic     | M | Hispanic/Latino (H)                     | 38 |
| 2013 CLAS   | ftic     | M | Native Hawaiian or Other Pacific Island | 1  |
| 2013 CLAS   | ftic     | M | Race and Ethnicity Unknown (X)          | 3  |
| 2013 CLAS   | ftic     | M | Two or More Races (M)                   | 5  |
| 2013 CLAS   | ftic     | M | White (W)                               | 65 |
| 2013 CLAS   | transfer | F | Asian (A)                               | 4  |
| 2013 CLAS   | transfer | F | Hispanic/Latino (H)                     | 6  |
| 2013 CLAS   | transfer | F | Race and Ethnicity Unknown (X)          | 1  |
| 2013 CLAS   | transfer | F | Two or More Races (M)                   | 1  |
| 2013 CLAS   | transfer | F | White (W)                               | 5  |
| 2013 CLAS   | transfer | M | Asian (A)                               | 2  |
| 2013 CLAS   | transfer | M | Black or African American (B)           | 1  |
| 2013 CLAS   | transfer | M | Hispanic/Latino (H)                     | 5  |
| 2013 CLAS   | transfer | M | Nonresident Alien (O)                   | 1  |
| 2013 CLAS   | transfer | M | Race and Ethnicity Unknown (X)          | 1  |
| 2013 CLAS   | transfer | M | White (W)                               | 6  |
|             |          |   |                                         |    |
| 2014 CALS   | ftic     | F | Asian (A)                               | 12 |
| 2014 CALS   | ftic     | F | Black or African American (B)           | 3  |
| 2014 CALS   | ftic     | F | Hispanic/Latino (H)                     | 18 |
| 2014 CALS   | ftic     | F | Native Hawaiian or Other Pacific Island | 2  |
| 2014 CALS   | ftic     | F | Race and Ethnicity Unknown (X)          | 2  |
| 2014 CALS   | ftic     | F | Two or More Races (M)                   | 2  |
| 2014 CALS   | ftic     | F | White (W)                               | 51 |
| 2014 CALS   | ftic     | M | Asian (A)                               | 10 |
| 2014 CALS   | ftic     | M | Black or African American (B)           | 2  |
| 2014 CALS   | ftic     | M | Hispanic/Latino (H)                     | 12 |
| 2014 CALS   | ftic     | M | Native Hawaiian or Other Pacific Island | 2  |
| 2014 CALS   | ftic     | M | Race and Ethnicity Unknown (X)          | 5  |
| 2014 CALS   | ftic     | M | Two or More Races (M)                   | 2  |
| 2014 CALS   | ftic     | M | White (W)                               | 42 |
| 2014 CALS   | transfer | F | Asian (A)                               | 4  |
| 2014 CALS   | transfer | F | Black or African American (B)           | 1  |
| 2014 CALS   | transfer | F | Hispanic/Latino (H)                     | 6  |
| 2014 CALS   | transfer | F | Nonresident Alien (O)                   | 1  |
| 2014 CALS   | transfer | F | White (W)                               | 15 |
| 2014 CALS   | transfer | M | American Indian or Alaska Native (I)    | 1  |
| 2014 CALS   | transfer | M | Asian (A)                               | 2  |
| 2014 CALS   | transfer | M | Black or African American (B)           | 2  |
| 2014 CALS   | transfer | M | Hispanic/Latino (H)                     | 10 |
| 2014 CALS   | transfer | M | Nonresident Alien (O)                   | 1  |
| 2014 CALS   | transfer | M | Race and Ethnicity Unknown (X)          | 1  |
| 2014 CALS   | transfer | M | White (W)                               | 15 |
| 2014 DE MCS | ftic     | F | Asian (A)                               | 1  |

|             |          |   |                                         |    |
|-------------|----------|---|-----------------------------------------|----|
| 2014 DE MCS | ftic     | F | Race and Ethnicity Unknown (X)          | 1  |
| 2014 DE MCS | ftic     | F | White (W)                               | 1  |
| 2014 DE MCS | transfer | F | Black or African American (B)           | 6  |
| 2014 DE MCS | transfer | F | Hispanic/Latino (H)                     | 14 |
| 2014 DE MCS | transfer | F | Native Hawaiian or Other Pacific Island | 1  |
| 2014 DE MCS | transfer | F | Race and Ethnicity Unknown (X)          | 4  |
| 2014 DE MCS | transfer | F | Two or More Races (M)                   | 2  |
| 2014 DE MCS | transfer | F | White (W)                               | 13 |
| 2014 DE MCS | transfer | M | Black or African American (B)           | 5  |
| 2014 DE MCS | transfer | M | Hispanic/Latino (H)                     | 5  |
| 2014 DE MCS | transfer | M | Race and Ethnicity Unknown (X)          | 1  |
| 2014 DE MCS | transfer | M | White (W)                               | 8  |
| 2014 CLAS   | ftic     | F | Asian (A)                               | 43 |
| 2014 CLAS   | ftic     | F | Black or African American (B)           | 14 |
| 2014 CLAS   | ftic     | F | Hispanic/Latino (H)                     | 47 |
| 2014 CLAS   | ftic     | F | Native Hawaiian or Other Pacific Island | 2  |
| 2014 CLAS   | ftic     | F | Race and Ethnicity Unknown (X)          | 8  |
| 2014 CLAS   | ftic     | F | Two or More Races (M)                   | 2  |
| 2014 CLAS   | ftic     | F | White (W)                               | 94 |
| 2014 CLAS   | ftic     | M | Asian (A)                               | 23 |
| 2014 CLAS   | ftic     | M | Black or African American (B)           | 3  |
| 2014 CLAS   | ftic     | M | Hispanic/Latino (H)                     | 40 |
| 2014 CLAS   | ftic     | M | Race and Ethnicity Unknown (X)          | 2  |
| 2014 CLAS   | ftic     | M | Two or More Races (M)                   | 5  |
| 2014 CLAS   | ftic     | M | White (W)                               | 59 |
| 2014 CLAS   | transfer | F | American Indian or Alaska Native (I)    | 1  |
| 2014 CLAS   | transfer | F | Asian (A)                               | 3  |
| 2014 CLAS   | transfer | F | Black or African American (B)           | 1  |
| 2014 CLAS   | transfer | F | Hispanic/Latino (H)                     | 7  |
| 2014 CLAS   | transfer | F | Native Hawaiian or Other Pacific Island | 1  |
| 2014 CLAS   | transfer | F | Race and Ethnicity Unknown (X)          | 1  |
| 2014 CLAS   | transfer | F | White (W)                               | 7  |
| 2014 CLAS   | transfer | M | Asian (A)                               | 3  |
| 2014 CLAS   | transfer | M | Black or African American (B)           | 1  |
| 2014 CLAS   | transfer | M | Hispanic/Latino (H)                     | 7  |
| 2014 CLAS   | transfer | M | Nonresident Alien (O)                   | 1  |
| 2014 CLAS   | transfer | M | Race and Ethnicity Unknown (X)          | 2  |
| 2014 CLAS   | transfer | M | White (W)                               | 8  |
| <hr/>       |          |   |                                         |    |
| 2015 CALS   | ftic     | F | Asian (A)                               | 13 |
| 2015 CALS   | ftic     | F | Black or African American (B)           | 3  |
| 2015 CALS   | ftic     | F | Hispanic/Latino (H)                     | 30 |
| 2015 CALS   | ftic     | F | Native Hawaiian or Other Pacific Island | 2  |
| 2015 CALS   | ftic     | F | Nonresident Alien (O)                   | 1  |
| 2015 CALS   | ftic     | F | Race and Ethnicity Unknown (X)          | 1  |
| 2015 CALS   | ftic     | F | Two or More Races (M)                   | 4  |
| 2015 CALS   | ftic     | F | White (W)                               | 53 |
| 2015 CALS   | ftic     | M | Asian (A)                               | 11 |
| 2015 CALS   | ftic     | M | Black or African American (B)           | 4  |
| 2015 CALS   | ftic     | M | Hispanic/Latino (H)                     | 20 |

|             |          |   |                                         |    |
|-------------|----------|---|-----------------------------------------|----|
| 2015 CALS   | ftic     | M | Native Hawaiian or Other Pacific Island | 1  |
| 2015 CALS   | ftic     | M | Race and Ethnicity Unknown (X)          | 1  |
| 2015 CALS   | ftic     | M | Two or More Races (M)                   | 3  |
| 2015 CALS   | ftic     | M | White (W)                               | 43 |
| 2015 CALS   | transfer | F | Asian (A)                               | 5  |
| 2015 CALS   | transfer | F | Black or African American (B)           | 2  |
| 2015 CALS   | transfer | F | Hispanic/Latino (H)                     | 10 |
| 2015 CALS   | transfer | F | Nonresident Alien (O)                   | 1  |
| 2015 CALS   | transfer | F | White (W)                               | 13 |
| 2015 CALS   | transfer | M | American Indian or Alaska Native (I)    | 1  |
| 2015 CALS   | transfer | M | Asian (A)                               | 1  |
| 2015 CALS   | transfer | M | Black or African American (B)           | 1  |
| 2015 CALS   | transfer | M | Hispanic/Latino (H)                     | 15 |
| 2015 CALS   | transfer | M | Nonresident Alien (O)                   | 1  |
| 2015 CALS   | transfer | M | Race and Ethnicity Unknown (X)          | 1  |
| 2015 CALS   | transfer | M | White (W)                               | 19 |
| 2015 DE MCS | ftic     | F | Black or African American (B)           | 1  |
| 2015 DE MCS | ftic     | F | Race and Ethnicity Unknown (X)          | 1  |
| 2015 DE MCS | transfer | F | Asian (A)                               | 2  |
| 2015 DE MCS | transfer | F | Black or African American (B)           | 5  |
| 2015 DE MCS | transfer | F | Hispanic/Latino (H)                     | 16 |
| 2015 DE MCS | transfer | F | Race and Ethnicity Unknown (X)          | 6  |
| 2015 DE MCS | transfer | F | Two or More Races (M)                   | 1  |
| 2015 DE MCS | transfer | F | White (W)                               | 21 |
| 2015 DE MCS | transfer | M | Asian (A)                               | 1  |
| 2015 DE MCS | transfer | M | Black or African American (B)           | 4  |
| 2015 DE MCS | transfer | M | Hispanic/Latino (H)                     | 9  |
| 2015 DE MCS | transfer | M | Native Hawaiian or Other Pacific Island | 1  |
| 2015 DE MCS | transfer | M | Race and Ethnicity Unknown (X)          | 1  |
| 2015 DE MCS | transfer | M | Two or More Races (M)                   | 1  |
| 2015 DE MCS | transfer | M | White (W)                               | 9  |
| 2015 CLAS   | ftic     | F | Asian (A)                               | 48 |
| 2015 CLAS   | ftic     | F | Black or African American (B)           | 8  |
| 2015 CLAS   | ftic     | F | Hispanic/Latino (H)                     | 55 |
| 2015 CLAS   | ftic     | F | Nonresident Alien (O)                   | 2  |
| 2015 CLAS   | ftic     | F | Race and Ethnicity Unknown (X)          | 7  |
| 2015 CLAS   | ftic     | F | Two or More Races (M)                   | 4  |
| 2015 CLAS   | ftic     | F | White (W)                               | 86 |
| 2015 CLAS   | ftic     | M | Asian (A)                               | 24 |
| 2015 CLAS   | ftic     | M | Black or African American (B)           | 3  |
| 2015 CLAS   | ftic     | M | Hispanic/Latino (H)                     | 32 |
| 2015 CLAS   | ftic     | M | Nonresident Alien (O)                   | 1  |
| 2015 CLAS   | ftic     | M | Race and Ethnicity Unknown (X)          | 4  |
| 2015 CLAS   | ftic     | M | Two or More Races (M)                   | 3  |
| 2015 CLAS   | ftic     | M | White (W)                               | 52 |
| 2015 CLAS   | transfer | F | American Indian or Alaska Native (I)    | 1  |
| 2015 CLAS   | transfer | F | Asian (A)                               | 4  |
| 2015 CLAS   | transfer | F | Hispanic/Latino (H)                     | 6  |
| 2015 CLAS   | transfer | F | Native Hawaiian or Other Pacific Island | 1  |
| 2015 CLAS   | transfer | F | White (W)                               | 5  |

|           |          |   |                                |    |
|-----------|----------|---|--------------------------------|----|
| 2015 CLAS | transfer | M | Asian (A)                      | 1  |
| 2015 CLAS | transfer | M | Black or African American (B)  | 3  |
| 2015 CLAS | transfer | M | Hispanic/Latino (H)            | 6  |
| 2015 CLAS | transfer | M | Nonresident Alien (O)          | 1  |
| 2015 CLAS | transfer | M | Race and Ethnicity Unknown (X) | 2  |
| 2015 CLAS | transfer | M | White (W)                      | 10 |

---



Retention, time to degree, and demographics of transfer students who matriculated from fall 2011 - spring 2014  
 Data for Figures 3 and 4

|         | Graduated in MCS | Graduated in STEM | Persisting in STEM | Not retained | Total |
|---------|------------------|-------------------|--------------------|--------------|-------|
| CALS TR | 24               | 9                 | 12                 | 13           | 58    |
| DE MCS  | 24               | 1                 | 7                  | 14           | 46    |

Number of semesters to graduate of transfer students who graduated in STEM

| CALS TR | DE MCS |
|---------|--------|
| 5       | 8      |
| 5       | 4      |
| 5       | 5      |
| 5       | 5      |
| 5       | 5      |
| 5       | 5      |
| 5       | 6      |
| 5       | 6      |
| 5       | 6      |
| 5       | 6      |
| 5       | 6      |
| 5       | 6      |
| 6       | 6      |
| 6       | 6      |
| 6       | 6      |
| 6       | 7      |
| 6       | 7      |
| 6       | 7      |
| 7       | 7      |
| 7       | 7      |
| 7       | 8      |
| 7       | 9      |
| 8       | 9      |
| 10      | 10     |
|         | 10     |

Demographics of transfer cohorts who graduated with a B.S. in MCS

|                   | DE MCS | CALS TR |
|-------------------|--------|---------|
| Hispanic F        | 9      | 1       |
| White F           | 7      | 5       |
| Black F           | 0      | 2       |
| unreported F      | 1      | 0       |
| Asian F           | 0      | 1       |
| American Indian F | 0      | 1       |
| Hispanic M        | 4      | 1       |
| White M           | 2      | 10      |
| Black M           | 1      | 1       |
| unreported M      | 0      | 2       |
| Asian M           | 0      | 0       |
| American Indian M | 0      | 0       |

| Math and Science Courses | CALS TR    |                    | DE MCS     |                    | p-value<br>(two-sided) |
|--------------------------|------------|--------------------|------------|--------------------|------------------------|
|                          | Mean Grade | Standard Deviation | Mean Grade | Standard Deviation |                        |
| Calculus 1               | 3.31       | 0.65               | 3.31       | 0.65               | 0.160                  |
| Biology 1                | 3.39       | 0.82               | 3.43       | 0.76               | 0.854                  |
| Biology 1 (Lab)          | 3.47       | 0.83               | 3.65       | 0.78               | 0.438                  |
| Biology 2                | 3.42       | 0.76               | 3.35       | 0.55               | 0.712                  |
| Biology 2 (Lab)          | 3.50       | 0.76               | 3.53       | 0.58               | 0.862                  |
| Chemistry 1              | 3.06       | 1.02               | 3.29       | 0.59               | 0.329                  |
| Chemistry 1 (Lab)        | 3.19       | 0.98               | 3.38       | 0.79               | 0.477                  |
| Chemistry 2              | 3.17       | 1.17               | 3.43       | 0.66               | 0.357                  |
| Chemistry 2 (Lab)        | 3.32       | 0.92               | 3.80       | 0.56               | 0.033                  |
| Organic Chemistry 1      | 3.07       | 0.84               | 2.49       | 1.03               | 0.038                  |
| Organic Chemistry 2      | 3.06       | 0.79               | 2.92       | 1.04               | 0.305                  |
| Organic Chemistry (Lab)  | 3.46       | 0.49               | 3.37       | 0.71               | 0.630                  |

**Supplemental Table 1. Math and science prerequisite course grade averages for on-campus (CALs TR) and distance based (DE MCS) graduates who transferred into Microbiology and Cell Science between 2011- 14 academic years.** The two transfer cohorts each consist of 24 students who have earned their B.S. in MCS. Courses represent those taken all students in cohort prior to transfer at respective community colleges. The mean course grades were compared with the Student's t-test and the two-sided p-value is shown. Mean course grades were calculated by converting the individual letter grades according to the standard CALS scale: A, 4.0; A-, 3.67; B+, 3.33; B, 3.0; B-, 2.67; C+, 2.33; C, 2.0; C-, 1.67; D+, 1.33; D, 1.0; D-, 0.67; E, 0.0. If a course was taken more than once, the first recorded grade was included in the analysis. None of the comparisons between the cohorts' course mean grades met the experiment-wide adjusted p-value threshold for significance of 0.004 or below.
